# Supplementary material
Source: Springer Nature journal article supplement (https://www.springermedizin.de/resource/supplementary/13099_2014_145_MOESM5_ESM.pdf/9665650)

**M 1 2 3 4 5 6 7 M**

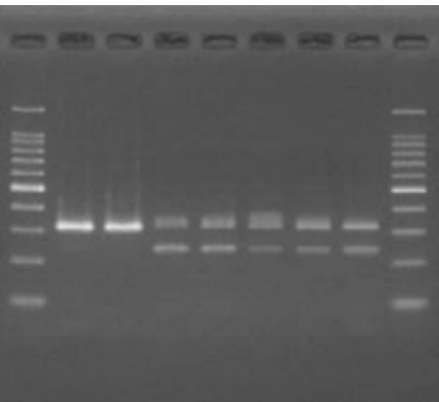

320 bp

238 bp

or

240 bp

Supplement: MOESM5 [file 9665650]
